# Supplementary material for: Crystal structures of the Arabidopsis thaliana organellar RNA editing factors MORF1 and MORF9
Source: PubMed Central journal article supplement — Nucleic Acids Res. 2017 Feb 14;45(8):4915–28. doi: 10.1093/nar/gkx099 (PMC5416752; doi:10.1093/nar/gkx099), 2017-02-14
Supplement: gkx099_Supp.pdf [file gkx099_Supp.pdf]

**Table S1 Data collection, phasing and refinement**

| <b>Data Collection</b>                  | <b>MORF1<sup>79-190</sup> NaBr</b> | <b>MORF1<sup>79-190</sup> Native</b> | <b>MORF9<sup>86-186</sup></b> |
|-----------------------------------------|------------------------------------|--------------------------------------|-------------------------------|
| <b>Wavelength (Å)</b>                   | 0.916                              | 1.771                                | 0.918                         |
| <b>Temperature (K)</b>                  | 100                                | 100                                  | 100                           |
| <b>Space Group</b>                      | P1                                 | P2 <sub>1</sub> <sup>(a)</sup>       | P6 <sub>5</sub> 22            |
| <b>Unit Cell (Å, °)</b>                 | 39.28 44.94 68.20                  | 68.89 69.81 69.32                    | 73.87 73.87 264.94            |
|                                         | 98.10 91.98 111.96                 | 90.0 108.95 90.0                     | 90.0 90.0 120.0               |
| <b>Resolution (Å)</b>                   | 50 – 1.5 (1.54 – 1.50)             | 50 - 1.94 (1.99 - 1.94)              | 50 – 2.25 (2.38 – 2.25)       |
| <b>Reflections</b>                      |                                    |                                      |                               |
| Unique                                  | 66951 (4771)                       | 44847 (2880)                         | 21313 (3327)                  |
| Completeness (%)                        | 97.6 (94.0)                        | 96.7 (83.9)                          | 99.6 (99.0)                   |
| Redundancy                              | 6.5 (3.6)                          | 6.1 (4.7)                            | 10.5 (10.8)                   |
| <b>I/σ(I)</b>                           | 10.29 (1.50)                       | 11.82 (2.32)                         | 16.99 (1.56)                  |
| <b>R<sub>sym</sub>(I)<sup>(b)</sup></b> | 0.11 (0.79)                        | 0.11 (0.63)                          | 0.09 (1.42)                   |
| <b>CC(1/2)<sup>(c)</sup></b>            | 99.7 (56.3)                        | 99.6 (56.9)                          | 99.9 (77.2)                   |
| <b>Phasing</b>                          |                                    |                                      |                               |
| <b>Resolution (Å)</b>                   | 38 – 1.5                           |                                      |                               |
| Br-sites                                | 26                                 |                                      |                               |
| <b>Phasing Power (acentric)</b>         |                                    |                                      |                               |
| isomorphous                             | -                                  |                                      |                               |
| anomalous                               | 0.8                                |                                      |                               |
| <b>R<sub>cullis</sub>(acentric)</b>     |                                    |                                      |                               |
| isomorphous                             | -                                  |                                      |                               |
| Anomalous                               | 0.88                               |                                      |                               |
| <b>Figure of merit (FOM)</b>            | 0.27                               |                                      |                               |
| <b>Refinement</b>                       |                                    |                                      |                               |
| <b>Resolution (Å)</b>                   | 37.99 - 1.5                        | 34.81 - 1.94                         | 46.01 – 2.25                  |
| <b>Reflections</b>                      |                                    |                                      |                               |
| Number                                  | 66950                              | 44844                                | 21308                         |
| Completeness (%)                        | 97.8                               | 96.8                                 | 99.6                          |
| Test Set (%)                            | 5.0                                | 5.0                                  | 5.0                           |
| <b>R<sub>work</sub><sup>(d)</sup></b>   | 0.1573                             | 0.163                                | 0.195                         |
| <b>R<sub>free</sub><sup>(d)</sup></b>   | 0.1923                             | 0.192                                | 0.238                         |
| <b>ESU (Å)<sup>(e)</sup></b>            | 0.15                               | n.a.                                 | 0.29                          |
| <b>Contents of A.U.<sup>(f)</sup></b>   |                                    |                                      |                               |
| Protein (Molecules)                     | 4                                  | 4                                    | 2                             |
| Protein (Residues)                      | 459                                | 460                                  | 202                           |
| Water Oxygens                           | 474                                | 416                                  | 157                           |
| <b>Mean B-Factors (Å<sup>2</sup>)</b>   |                                    |                                      |                               |
| Wilson                                  | 12.44                              | n.a.                                 | 50.1                          |
| Protein                                 | 21.38                              | 32.32                                | 59.7                          |
| Water                                   | 31.05                              | 34.52                                | 58.4                          |
| <b>Ramachandran Plot<sup>(g)</sup></b>  |                                    |                                      |                               |
| Favored (%)                             | 97.84                              | 97.35                                | 96.97                         |
| Outliers (%)                            | 0                                  | 0                                    | 0                             |
| <b>Rmsd<sup>(h)</sup></b>               |                                    |                                      |                               |
| Bond Lengths (Å)                        | 0.013                              | 0.007                                | 0.009                         |
| Bond Angles (°)                         | 1.240                              | 0.830                                | 0.979                         |
| Dihedral Angles (°)                     | 19.00                              | 16.57                                | 13.83                         |

<sup>(a)</sup> pseudo-merohedral twinned, twin law: h, -k, l, twin fraction 0.14

<sup>(b)</sup>  $R_{sym}(I) = \sum_{hkl} \sum_i |I_i(hkl) - \langle I(hkl) \rangle| / \sum_{hkl} \sum_i I_i(hkl)$ ; for n independent reflections and i observations of a given reflection;  $\langle I(hkl) \rangle$  – average intensity of the i observations

<sup>(c)</sup> Correlation factor CC(1/2) between random half-datasets for reporting results in XDS CORRECT and XSCALE (51).

<sup>(d)</sup>  $R = \sum_{hkl} ||F_{obs}| - |F_{calc}|| / \sum_{hkl} |F_{obs}|$ ;  $R_{work} - hkl \notin T$ ;  $R_{free} - hkl \in T$ ;  $R_{all}$  – all reflections;

<sup>(e)</sup> ESU – estimated overall coordinate error based on maximum likelihood

<sup>(f)</sup> A.U. – asymmetric unit

<sup>(g)</sup> Calculated with MolProbity (52) <sup>(h)</sup> Rmsd – root-mean-square deviation from target geometry

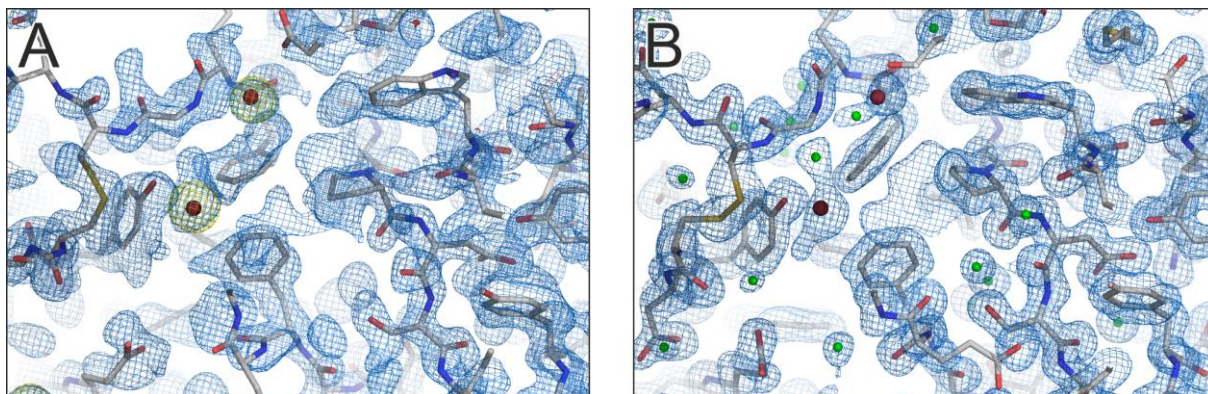

**Figure S1** Quality of the experimental and refined electron density maps of MORF<sup>79-190</sup>. **(A)** Central region of the MORF<sup>79-190</sup> tetrameric structure (grey) and surrounding experimental solvent-flattened electron density shown as blue mesh contoured at the 1  $\sigma$  level. An anomalous density map of the Br-signal calculated with initial phases is shown as yellow mesh, contoured at the 5  $\sigma$  level **(B)** The final  $2F_o-F_c$  electron density map covering the same region as in (A) is shown as a blue mesh, contoured at the 1  $\sigma$  level. Residues are shown as sticks and colored by atom type. Carbon - grey; nitrogen – blue; oxygen – red; sulfur – yellow. Water oxygens are shown as green spheres, bromide ions as fire brick spheres

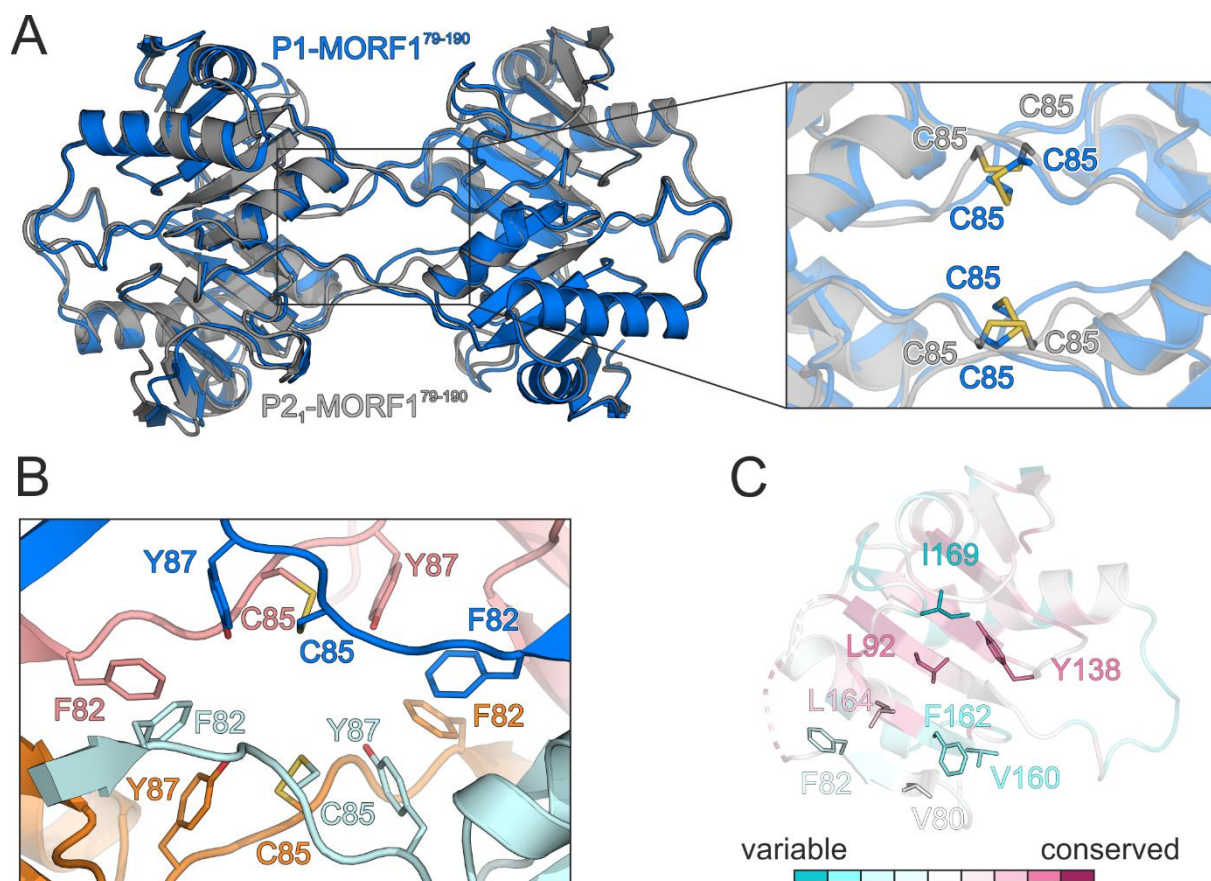

**Figure S2** Flexibility of the central tetrameric interface in two crystal lattices and conservation of the hydrophobic MORF<sup>79-190</sup> dimerization interface. **(A)** P1 (marine) and P2<sub>1</sub> (grey) crystal structures of tetrameric MORF<sup>79-190</sup> superimposed. Inset – Close-up view illustrates the intrinsic flexibility of the central interface. Disulfide bridges are shown as sticks. Carbon - as for the respective molecule; sulfur - yellow, **(B)** F82 and Y87 (shown as sticks) of all four MORF<sup>79-190</sup> chains form a hydrophobic cage at the central interface surrounding the two disulfide bridges. Carbon - as for the respective molecule; oxygen – red; sulfur – yellow. **(C)** Conservation scores including 124 non-redundant MORF-related sequences obtained by CONSURF (30) plotted on the structure of MORF<sup>79-190</sup>. Residues forming the main hydrophobic dimerization interface are shown as sticks. Dashed lines in the ribbon plots represent modeled residues G84-D86 of MORF<sup>79-190</sup>.

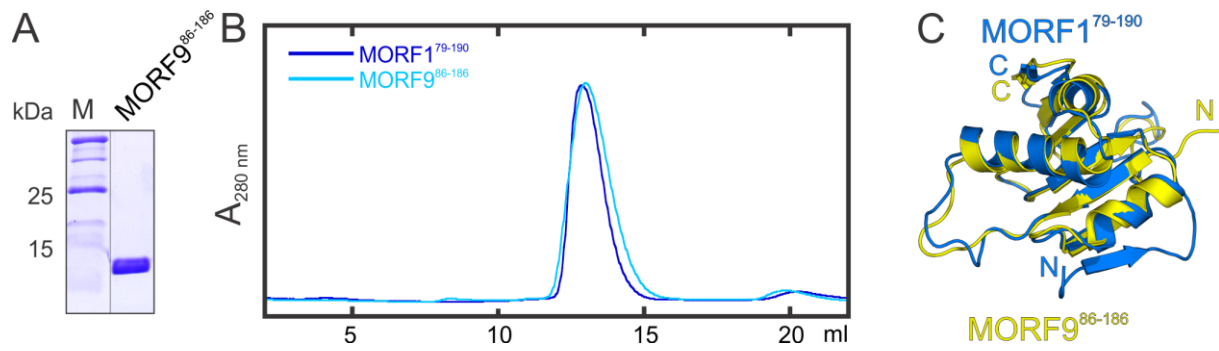

**Figure S3** Quality of MORF9<sup>86-186</sup> preparation and comparison of MORF1<sup>79-190</sup> and MORF9<sup>86-186</sup> by gel filtration and structural superimposition **(A)** SDS PAGE analysis of MORF9<sup>86-186</sup> **(B)** Analytical gel filtration (Superdex 75) to compare the molecular weight of MORF1<sup>79-190</sup> (blue) and MORF9<sup>86-186</sup> (cyan). Absorbance was monitored at 280 nm. **(C)** MORF1<sup>79-190</sup> (marine blue) and MORF9<sup>86-186</sup> (yellow) monomers superimposed.
